## CORRECTION

# Correction: The role of perceptions and knowledge of leprosy in the elimination of leprosy: A baseline study in Fatehpur district, northern India

Anna T. van 't Notableordende, Ida J. Korfage, Suchitra Lisam, Mohammed A. Arif, Anil Kumar, Wim H. van Brakel

There is an error in the fifth sentence in the Results sub-section Attitude, stigma and social distance. The correct sentence is: We found that participants who knew a person affected by leprosy had lower mean EMIC-CSS scores and therefore lower levels of perceived stigma, compared to participants who did not know a person affected by leprosy (14.2 vs 17.3,  $p < 0.001$ , independent samples t-test).

The seventh paragraph in the Discussion section misreports the study findings. The paragraph should read: In our study participants who knew a person affected by leprosy and those who were a close contact of someone affected perceived lower levels of stigma. Knowing a person affected also appeared to reduce the desire for social distance towards leprosy patients, but this effect did not quite reach statistical significance in the multivariate analysis. Nevertheless, it seems that knowing someone affected could potentially improve personal attitudes towards and reduce fear of person affected.

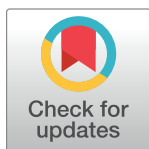

## OPEN ACCESS

**Citation:** van 't Notableordende AT, Korfage IJ, Lisam S, Arif MA, Kumar A, van Brakel WH (2022) Correction: The role of perceptions and knowledge of leprosy in the elimination of leprosy: A baseline study in Fatehpur district, northern India. PLoS Negl Trop Dis 16(6): e0010519. <https://doi.org/10.1371/journal.pntd.0010519>

**Published:** June 6, 2022

**Copyright:** © 2022 van 't Notableordende et al. This is an open access article distributed under the terms of the [Creative Commons Attribution License](#), which permits unrestricted use, distribution, and reproduction in any medium, provided the original author and source are credited.

There is an error in the first column heading in [Table 4](#). Please see the correct [Table 4](#) below.

In [Tables 3](#) and [5](#), there is an incidental asterisk footnote that should not be present. Please see the correct [Tables 3](#) and [5](#) below.

**Table 3. Correlations between level of knowledge about leprosy and the other variables in the dataset.** This model explained 16% of the variability of knowledge of leprosy (R-squared = 0.15).

|  |                                   | Regression coefficient | Standard error | p-value | N   |
|--|-----------------------------------|------------------------|----------------|---------|-----|
|  | Constant                          | 2.678                  | .118           | .000    |     |
|  | Health care worker                | .912                   | .206           | .000    | 50  |
|  | Completed higher education        | .483                   | .148           | .001    | 158 |
|  | Knows someone affected by leprosy | .345                   | .134           | .011    | 225 |

<https://doi.org/10.1371/journal.pntd.0010519.t001>

**Table 4. Mean total scores per participants group.** A high score on the KAP measure reflects higher knowledge, whereas high EMIC-CSS and SDS scores reflect higher levels of stigma and desired social distance respectively.

|                    | KAP measure (7 knowledge items), range 0–7 |       | EMIC-CSS (17-items), range 0–30 |       | SDS (7-items), range 0–21 |       |
|--------------------|--------------------------------------------|-------|---------------------------------|-------|---------------------------|-------|
|                    | Mean (95%CI)                               | Range | Mean (95%CI)                    | Range | Mean (95%CI)              | Range |
| Index patient      | 3.3 (3.08–3.52)                            | 0–6   | -                               | -     | -                         | -     |
| Close contact      | 3.2 (3.00–3.41)                            | 0–5   | 13.9 (12.7–15.1)                | 0–26  | 7.0 (5.99–8.01)           | 0–21  |
| Community member   | 3.0 (2.83–3.17)                            | 0–5   | 16.2 (15.2–17.2)                | 2–30  | 8.2 (7.36–9.04)           | 0–21  |
| Health care worker | 4.2 (3.80–4.60)                            | 0–7   | 14.9 (13.4–16.4)                | 0–24  | 4.2 (3.22–5.18)           | 0–13  |
| All groups         | 3.2 (3.13–3.35)                            | 0–7   | 15.3 (14.6–16.0)                | 0–30  | 7.2 (6.61–7.79)           | 0–21  |

<https://doi.org/10.1371/journal.pntd.0010519.t002>

**Table 5. Correlations between level of stigma and the other variables in the dataset.** This model explained 15% of the variability of stigma towards persons affected by leprosy (R-squared = 0.148).

|  |                                                    | Regression coefficient | Standard error | p-value | N   |
|--|----------------------------------------------------|------------------------|----------------|---------|-----|
|  | Constant                                           | 15.003                 | 1.012          | .000    |     |
|  | Thinks leprosy transmits by air                    | 4.461                  | 1.531          | .004    | 18  |
|  | Thinks leprosy is a divine punishment for sins     | 3.974                  | 1.667          | .018    | 17  |
|  | Thinks leprosy is caused by an unclean environment | 2.873                  | 1.253          | .023    | 35  |
|  | Knows someone affected by leprosy                  | -2.393                 | .722           | .001    | 224 |
|  | Thinks leprosy transmits through skin contact      | 2.305                  | .731           | .002    | 120 |
|  | Indicate they don't know what causes leprosy       | 2.208                  | .859           | .011    | 216 |
|  | Occupation is paid work                            | -1.710                 | .729           | .020    | 115 |
|  | Close contact                                      | -1.576                 | .760           | .039    | 110 |

<https://doi.org/10.1371/journal.pntd.0010519.t003>

## Reference

1. van 't Noordende AT, Korfage IJ, Lisam S, Arif MA, Kumar A, van Brakel WH (2019) The role of perceptions and knowledge of leprosy in the elimination of leprosy: A baseline study in Fatehpur district, northern India. *PLoS Negl Trop Dis* 13(4): e0007302. <https://doi.org/10.1371/journal.pntd.0007302> PMID: 30951526
